# Supplementary material for: BA.2.12.1, BA.4 and BA.5 escape antibodies elicited by Omicron BA.1 infection
Source: Research Square preprint supplement (doi:10.21203/rs.3.rs-1611421/v1), 2022-05-02
Supplement: Supplementary file 5 [file add4440cc50df27804a6b977.docx]

**BA.2.12.1, BA.4 and BA.5 escape antibodies elicited by Omicron infection**

Yunlong Cao1,2,#,*, Ayijiang Yisimayi2,3,#, Fanchong Jian2,4,#, Weiliang Song2,3,#, Tianhe Xiao2,5,#, Lei Wang6,#, Shuo Du3,#, Jing Wang2,3,#, Qianqian Li7,#, Xiaosu Chen8,#, Peng Wang1, Zhiying Zhang3, Pulan Liu3, Ran An2, Xiaohua Hao9, Yao Wang1, Jing Wang1, Rui Feng6, Haiyan Sun1, Lijuan Zhao1, Wen Zhang9, Dong Zhao9, Jiang Zheng1, Lingling Yu1, Can Li1, Na Zhang1, Rui Wang1, Xiao Niu2,4, Sijie Yang2,10, Xuetao Song1, Linlin Zheng1, Zhiqiang Li10,11, Qingqing Gu1, Fei Shao1, Weijin Huang7, Ronghua Jin9, Zhongyang Shen12,*, Youchun Wang7,*, Xiangxi Wang6,*, Junyu Xiao3,10,11,*, Xiaoliang Sunney Xie1,2,*

1Changping Laboratory, Beijing, P.R. China.

2Biomedical Pioneering Innovation Center (BIOPIC), Peking University, Beijing, P.R. China.

3School of Life Sciences, Peking University, Beijing, P.R. China.

4College of Chemistry and Molecular Engineering, Peking University, Beijing, P.R. China.

5Joint Graduate Program of Peking-Tsinghua-NIBS, Academy for Advanced Interdisciplinary Studies, Peking University, Beijing, China.

6CAS Key Laboratory of Infection and Immunity, National Laboratory of Macromolecules, Institute of Biophysics, Chinese Academy of Sciences, Beijing, P.R. China.

7Division of HIV/AIDS and Sex-transmitted Virus Vaccines, Institute for Biological Product Control, National Institutes for Food and Drug Control (NIFDC), Beijing, P.R. China.

8Institute for Immunology, College of Life Sciences, Nankai University, Tianjin, P. R. China.

9Beijing Ditan Hospital, Capital Medical University, Beijing, P.R. China.

10Peking-Tsinghua Center for Life Sciences, Peking University, Beijing, P.R. China

11Academy for Advanced Interdisciplinary Studies, Peking University, Beijing, P.R. China.

12 Organ Transplant Center, NHC Key Laboratory for Critical Care Medicine, Tianjin First Central Hospital, Nankai University, Tianjin, P. R. China.

*Correspondence: Yunlong Cao (yunlongcao@pku.edu.cn); Zhongyang Shen (zhongyangshen@nankai.edu.cn); Youchun Wang (wangyc@nifdc.org.cn); Xiangxi Wang (xiangxi@ibp.ac.cn); Junyu Xiao (junyuxiao@pku.edu.cn); Xiaoliang Sunney Xie ([sunneyxie@biopic.pku.edu.cn](mailto:sunneyxie@biopic.pku.edu.cn))

#These authors contributed equally.

**Supplementary Information Guide**

Supplementary Table 1

Summarized information of SARS-CoV-2 vaccinated individuals, BA.1 convalescents and SARS convalescents involved in the study.

Supplementary Table 2

Summarized information and experiment results of 1640 SARS-CoV-2 RBD antibodies involved in this study, including their sources, epitope groups, pseudovirus neutralizing IC50 and ELISA OD450 for sarbecovirus, ACE2 competition levels, and heavy/light chain sequences.

Supplementary Table 3

Accession numbers of sequences of sarbecovirus used in the study.

Supplementary Table 4

Reports of the reconstructed Cryo-EM structures of NAbs in complex with SARS-CoV-2 variants RBD, and spike glycoprotein of Omicron subvariants.
